# Supplementary material
Source: PubMed Central journal article supplement (PMC153114)
Supplement: mbc_14_4_1460__2.pdf [file mbc_14_4_1460__2.pdf]

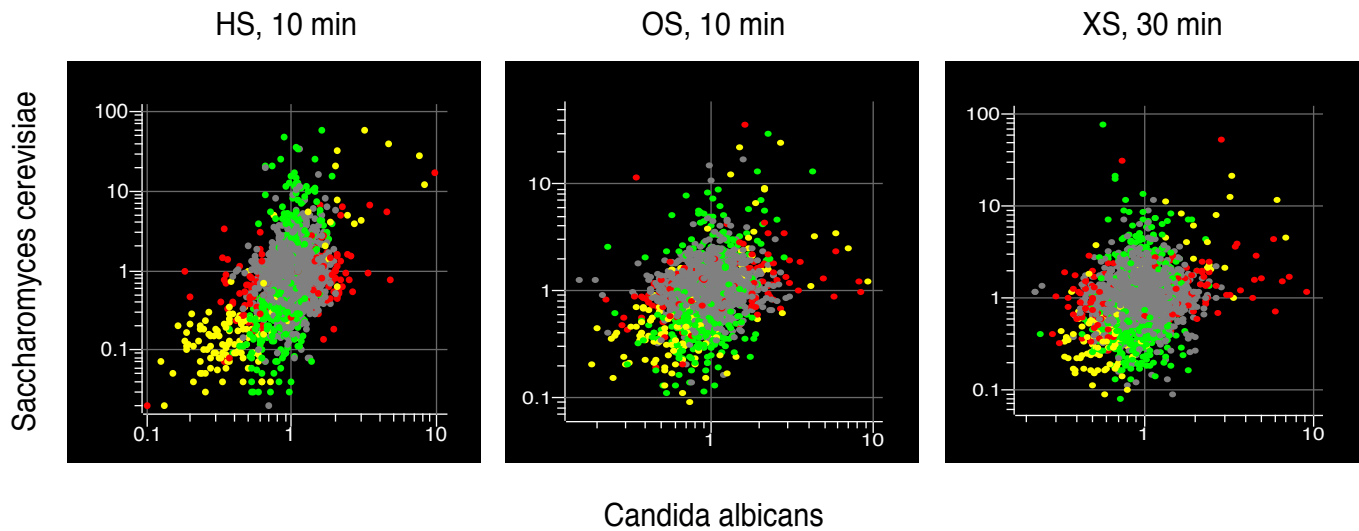

Supplementary Figure 2: Comparison of the stress-inducible changes in gene expression between *Candida albicans* and *Saccharomyces cerevisiae*. *Candida* gene names were replaced by the names of the gene from budding yeast with the greatest similarity (If Blast E-value <  $10e-10$ ). These scatter plots compare the responses of both fungi to heat (HS), osmotic (OS) and oxydative (XS) stress. Data from budding yeast was obtained from Gasch et al. (2000). Genes colored in green were classified as being modulated during the general stress response in budding yeast. Homologs of genes colored in red were shown to be significantly modulated by the indicated stress in *Candida*. Genes that belong in both classifications are colored in yellow.
